# Supplementary material
Source: MDPI journal article supplement (https://www.mdpi.com/2077-1312/10/11/1676)
Supplement: s1 [file s1]

Supplementary Table S1. Relation expression between marine algal coverage and fresh weight.

| Species                       | Linear regression (FW = aC) |                |                     |          | Power regression (FW = aC <sup>b</sup> ) |             |                |                     |         | FW/Cov. ratio |     |
|-------------------------------|-----------------------------|----------------|---------------------|----------|------------------------------------------|-------------|----------------|---------------------|---------|---------------|-----|
|                               | a (SE)                      | R <sup>2</sup> | Adj. R <sup>2</sup> | F-value  | a (SE)                                   | b (SE)      | R <sup>2</sup> | Adj. R <sup>2</sup> | F-value | Mean (SE)     | n   |
| <i>Ecklonia cava</i>          | 25.69 (0.36)                | 0.90           | 0.90                | 5034.19  | 9.20 (0.02)                              | 1.22 (0.46) | 0.91           | 0.91                | 5989.65 | 20.41 (10.56) | 587 |
| <i>Gelidium elegans</i>       | 13.61 (0.14)                | 0.95           | 0.95                | 9706.99  | 5.09 (0.01)                              | 1.24 (0.16) | 0.93           | 0.93                | 7846.03 | 8.65 (5.05)   | 559 |
| <i>Plocamium telfairiae</i>   | 12.63 (0.11)                | 0.96           | 0.96                | 14110.68 | 6.01 (0.02)                              | 1.18 (0.15) | 0.92           | 0.91                | 5659.05 | 7.74 (3.76)   | 530 |
| <i>Corallina pilulifera</i>   | 6.95 (0.07)                 | 0.95           | 0.95                | 9024.81  | 5.85 (0.01)                              | 1.03 (0.16) | 0.91           | 0.91                | 5089.48 | 6.76 (3.05)   | 522 |
| <i>Corallina aberrans</i>     | 10.72 (0.12)                | 0.94           | 0.94                | 8458.36  | 6.63 (0.01)                              | 1.11 (0.19) | 0.92           | 0.92                | 6209.81 | 8.57 (3.28)   | 516 |
| <i>Peyssonnelia caulifera</i> | 4.11 (0.05)                 | 0.93           | 0.93                | 6299.26  | 3.98 (0.01)                              | 1.00 (0.11) | 0.95           | 0.95                | 8267.55 | 4.25 (1.42)   | 486 |
| <i>Rhodomenia intricata</i>   | 6.41 (0.05)                 | 0.97           | 0.97                | 14357.59 | 4.17 (0.01)                              | 1.11 (0.08) | 0.95           | 0.95                | 7608.09 | 4.80 (1.70)   | 426 |
| <i>Amphiroa beauvoisii</i>    | 8.79 (0.12)                 | 0.94           | 0.94                | 5495.86  | 4.23 (0.02)                              | 1.18 (0.14) | 0.92           | 0.92                | 4206.46 | 5.89 (2.778)  | 361 |
| <i>Sargassum horneri</i>      | 18.00 (0.29)                | 0.92           | 0.92                | 3963.62  | 5.38 (0.02)                              | 1.29 (0.21) | 0.94           | 0.94                | 5159.58 | 9.91 (6.49)   | 329 |
| <i>Acrosorium ciliolatum</i>  | 5.94 (0.06)                 | 0.98           | 0.98                | 10046.99 | 3.24 (0.02)                              | 1.20 (0.10) | 0.93           | 0.93                | 3040.09 | 3.96 (1.69)   | 237 |
| <i>Rugulopteryx okamurae</i>  | 6.05 (0.08)                 | 0.96           | 0.96                | 5436.97  | 3.15 (0.03)                              | 1.28 (0.09) | 0.92           | 0.92                | 2454.69 | 3.95 (1.91)   | 211 |
| <i>Callophyllis adhaerens</i> | 2.639 (0.03)                | 0.98           | 0.98                | 10734.15 | 2.12 (0.02)                              | 1.16 (0.05) | 0.93           | 0.93                | 2637.26 | 2.26 (0.69)   | 206 |
| <i>Grateloupia elliptica</i>  | 26.51 (0.52)                | 0.93           | 0.93                | 2611.16  | 7.36 (0.02)                              | 1.30 (0.41) | 0.94           | 0.94                | 3036.90 | 15.05 (8.50)  | 200 |
| <i>Sargassum macrocarpum</i>  | 19.25 (0.33)                | 0.95           | 0.95                | 3435.58  | 8.33 (0.02)                              | 1.19 (0.55) | 0.94           | 0.94                | 3035.87 | 15.56 (6.49)  | 193 |
| <i>Lithophyllum okamurae</i>  | 28.02 (0.45)                | 0.95           | 0.95                | 3848.92  | 19.23 (0.02)                             | 1.10 (0.61) | 0.93           | 0.93                | 2485.61 | 22.34 (7.57)  | 189 |
| <i>Phycodrys fimbriata</i>    | 9.56 (0.17)                 | 0.95           | 0.95                | 3129.22  | 4.72 (0.02)                              | 1.16 (0.25) | 0.93           | 0.93                | 2355.73 | 6.94 (3.88)   | 183 |
| <i>Undaria pinnatifida</i>    | 22.03 (0.59)                | 0.90           | 0.89                | 1387.26  | 6.50 (0.03)                              | 1.34 (0.44) | 0.94           | 0.94                | 2748.87 | 16.56 (9.10)  | 164 |
| <i>Amphiroa anceps</i>        | 11.58 (0.22)                | 0.95           | 0.95                | 2842.85  | 5.60 (0.03)                              | 1.18 (0.36) | 0.90           | 0.90                | 1444.45 | 8.54 (3.59)   | 163 |
| <i>Codium hubbsii</i>         | 10.84 (0.16)                | 0.97           | 0.97                | 4916.18  | 7.23 (0.02)                              | 1.17 (0.23) | 0.94           | 0.94                | 2418.77 | 8.73 (2.78)   | 161 |

Supplementary Table S1. Continued.

| Species                             | Linear regression (FW = aC) |                |                     |         | Power regression (FW = aC <sup>b</sup> ) |             |                |                     |         | FW/Cov. ratio |     |
|-------------------------------------|-----------------------------|----------------|---------------------|---------|------------------------------------------|-------------|----------------|---------------------|---------|---------------|-----|
|                                     | a (SE)                      | R <sup>2</sup> | Adj. R <sup>2</sup> | F-value | a (SE)                                   | b (SE)      | R <sup>2</sup> | Adj. R <sup>2</sup> | F-value | Mean (SE)     | n   |
| <i>Gracilaria textorii</i>          | 6.65 (0.09)                 | 0.97           | 0.97                | 5170.57 | 4.18 (0.02)                              | 1.19 (0.12) | 0.96           | 0.96                | 3426.97 | 5.06 (1.85)   | 160 |
| <i>Dichotomaria falcata</i>         | 10.40 (0.19)                | 0.95           | 0.95                | 2973.83 | 6.25 (0.03)                              | 1.12 (0.37) | 0.90           | 0.89                | 1270.44 | 8.30 (3.66)   | 151 |
| <i>Callophyllis crispata</i>        | 1.16 (0.02)                 | 0.96           | 0.96                | 3218.52 | 1.24 (0.02)                              | 0.95 (0.03) | 0.94           | 0.94                | 2300.56 | 1.27 (0.38)   | 149 |
| <i>Grateloupia cornea</i>           | 11.79 (0.15)                | 0.98           | 0.98                | 5842.61 | 5.38 (0.04)                              | 1.23 (0.30) | 0.90           | 0.90                | 1183.80 | 7.72 (3.93)   | 149 |
| <i>Synarthrophyton chejuense</i>    | 2.95 (0.06)                 | 0.94           | 0.94                | 2420.59 | 2.64 (0.03)                              | 1.05 (0.12) | 0.87           | 0.87                | 1002.97 | 3.00 (1.08)   | 146 |
| <i>Dictyopteris prolifera</i>       | 10.62 (0.18)                | 0.96           | 0.96                | 3347.38 | 6.08 (0.04)                              | 1.18 (0.33) | 0.87           | 0.87                | 994.96  | 7.98 (4.16)   | 146 |
| <i>Dictyota coriacea</i>            | 12.17 (0.24)                | 0.95           | 0.95                | 2627.68 | 5.90 (0.03)                              | 1.18 (0.28) | 0.94           | 0.94                | 2036.47 | 8.15 (3.38)   | 140 |
| <i>Pterocladia capillacea</i>       | 12.25 (0.17)                | 0.97           | 0.97                | 5144.55 | 4.87 (0.03)                              | 1.21 (0.29) | 0.91           | 0.91                | 1342.22 | 7.08 (3.95)   | 138 |
| <i>Chondracanthus tenellus</i>      | 9.58 (0.17)                 | 0.96           | 0.96                | 3134.26 | 4.04 (0.03)                              | 1.20 (0.20) | 0.93           | 0.93                | 1882.26 | 5.64 (2.65)   | 136 |
| <i>Chondracanthus intermedius</i>   | 2.91 (0.04)                 | 0.98           | 0.98                | 5164.52 | 2.63 (0.03)                              | 0.99 (0.09) | 0.90           | 0.90                | 1105.06 | 2.84 (1.11)   | 131 |
| <i>Fushitsunagia catenata</i>       | 12.49 (0.19)                | 0.97           | 0.97                | 4297.01 | 6.39 (0.02)                              | 1.16 (0.24) | 0.96           | 0.96                | 2750.18 | 7.95 (3.29)   | 126 |
| <i>Ulva australis</i>               | 4.95 (0.12)                 | 0.94           | 0.94                | 1809.32 | 3.53 (0.03)                              | 1.10 (0.15) | 0.93           | 0.93                | 1670.04 | 4.14 (1.78)   | 121 |
| <i>Alatocladia modesta</i>          | 10.49 (0.25)                | 0.94           | 0.94                | 1774.29 | 6.45 (0.04)                              | 1.14 (0.37) | 0.90           | 0.90                | 1080.68 | 8.42 (3.52)   | 117 |
| <i>Grateloupia angusta</i>          | 5.80 (0.13)                 | 0.95           | 0.95                | 2079.54 | 4.69 (0.04)                              | 1.07 (0.30) | 0.90           | 0.90                | 883.19  | 5.54 (1.96)   | 104 |
| <i>Acrosorium polyneurum</i>        | 6.08 (0.13)                 | 0.96           | 0.96                | 2136.42 | 3.75 (0.03)                              | 1.15 (0.22) | 0.93           | 0.93                | 1191.80 | 4.85 (2.21)   | 97  |
| <i>Padina arborescens</i>           | 11.44 (0.24)                | 0.96           | 0.96                | 2351.09 | 6.52 (0.03)                              | 1.11 (0.35) | 0.95           | 0.95                | 1921.50 | 8.25 (2.77)   | 95  |
| <i>Colpomenia sinuosa</i>           | 14.64 (0.34)                | 0.95           | 0.95                | 1820.52 | 6.61 (0.04)                              | 1.24 (0.35) | 0.92           | 0.92                | 952.65  | 8.45 (4.44)   | 88  |
| <i>Callophyllis japonica</i>        | 11.20 (0.29)                | 0.95           | 0.95                | 1491.22 | 5.40 (0.05)                              | 1.24 (0.36) | 0.90           | 0.89                | 703.86  | 7.42 (3.90)   | 85  |
| <i>Symphyocladia marchantioides</i> | 5.31 (0.16)                 | 0.95           | 0.95                | 1500.05 | 3.87 (0.05)                              | 1.28 (0.17) | 0.91           | 0.91                | 802.87  | 4.27 (1.74)   | 83  |

Supplementary Table S1. Continued.

| Species                                        | Linear regression (FW = aC) |                |                     |          | Power regression (FW = aC <sup>b</sup> ) |             |                |                     |         | FW/Cov. ratio |    |
|------------------------------------------------|-----------------------------|----------------|---------------------|----------|------------------------------------------|-------------|----------------|---------------------|---------|---------------|----|
|                                                | a (SE)                      | R <sup>2</sup> | Adj. R <sup>2</sup> | F-value  | a (SE)                                   | b (SE)      | R <sup>2</sup> | Adj. R <sup>2</sup> | F-value | Mean (SE)     | n  |
| <i>Carpomitra costata</i>                      | 8.04 (0.21)                 | 0.95           | 0.95                | 1440.22  | 4.11 (0.03)                              | 1.13 (0.25) | 0.95           | 0.95                | 1594.27 | 5.39 (2.28)   | 82 |
| <i>Ecklonia bicyclis</i>                       | 38.20 (1.19)                | 0.93           | 0.93                | 1024.57  | 16.13 (0.04)                             | 1.16 (2.02) | 0.92           | 0.92                | 952.39  | 28.94 (10.29) | 80 |
| <i>Corallina confusa</i>                       | 5.47 (0.05)                 | 0.99           | 0.99                | 12633.90 | 4.69 (0.03)                              | 1.07 (0.17) | 0.95           | 0.95                | 1338.33 | 5.05 (1.38)   | 76 |
| <i>Sargassum coreanum</i>                      | 14.85 (0.39)                | 0.95           | 0.95                | 1474.62  | 7.16 (0.04)                              | 1.18 (0.86) | 0.92           | 0.92                | 813.53  | 12.55 (4.49)  | 74 |
| <i>Amphiroa foliacea</i>                       | 6.06 (0.17)                 | 0.95           | 0.95                | 1306.40  | 5.08 (0.03)                              | 1.06 (0.23) | 0.93           | 0.93                | 966.53  | 5.61 (1.61)   | 72 |
| <i>Cladophora wrightiana</i> var. <i>minor</i> | 12.58 (0.34)                | 0.95           | 0.95                | 1377.53  | 6.71 (0.04)                              | 1.14 (0.52) | 0.93           | 0.93                | 936.58  | 9.17 (3.75)   | 71 |
| <i>Sargassum patens</i>                        | 20.69 (0.42)                | 0.97           | 0.97                | 2467.34  | 13.13 (0.02)                             | 1.08 (0.68) | 0.98           | 0.98                | 2790.63 | 16.18 (4.32)  | 69 |
| <i>Umbraulva japonica</i>                      | 4.17 (0.08)                 | 0.98           | 0.98                | 2674.83  | 3.23 (0.03)                              | 1.11 (0.12) | 0.95           | 0.95                | 1310.81 | 3.63 (0.90)   | 69 |
| <i>Plocamium cartilagineum</i>                 | 6.22 (0.20)                 | 0.93           | 0.93                | 928.68   | 3.48 (0.04)                              | 1.38 (0.14) | 0.94           | 0.94                | 989.89  | 4.22 (1.90)   | 69 |
| <i>Callophyllis rhynchocarpa</i>               | 3.73 (0.08)                 | 0.97           | 0.97                | 2321.54  | 2.60 (0.04)                              | 1.19 (0.11) | 0.94           | 0.94                | 966.46  | 2.89 (0.93)   | 67 |
| <i>Chondrus ocellatus</i>                      | 6.90 (0.17)                 | 0.96           | 0.96                | 1725.89  | 2.64 (0.05)                              | 1.39 (0.18) | 0.94           | 0.94                | 964.56  | 4.52 (2.14)   | 66 |
| <i>Calliblepharis saidana</i>                  | 2.30 (0.06)                 | 0.97           | 0.97                | 1717.40  | 1.81 (0.03)                              | 1.08 (0.10) | 0.95           | 0.95                | 1152.25 | 2.08 (0.64)   | 61 |
| <i>Herpochondria dentata</i>                   | 2.80 (0.09)                 | 0.94           | 0.94                | 965.82   | 2.33 (0.04)                              | 1.09 (0.11) | 0.92           | 0.91                | 615.93  | 2.55 (0.83)   | 59 |
| <i>Delisea pulchra</i>                         | 10.73 (0.43)                | 0.92           | 0.91                | 629.01   | 3.41 (0.08)                              | 1.44 (0.40) | 0.86           | 0.86                | 343.73  | 6.92 (4.12)   | 59 |
| <i>Pachyarthon cretaceum</i>                   | 10.08 (0.32)                | 0.95           | 0.95                | 1002.56  | 8.55 (0.05)                              | 1.08 (0.53) | 0.90           | 0.89                | 482.04  | 9.68 (3.25)   | 58 |
| <i>Corallina officinalis</i>                   | 8.89 (0.20)                 | 0.97           | 0.97                | 1943.55  | 6.31 (0.04)                              | 1.10 (0.38) | 0.95           | 0.95                | 972.13  | 7.48 (2.09)   | 57 |
| <i>Gelium yoshidae</i>                         | 7.68 (0.26)                 | 0.94           | 0.94                | 896.96   | 5.34 (0.05)                              | 1.12 (0.40) | 0.90           | 0.90                | 507.43  | 6.51 (2.35)   | 57 |
| <i>Myagropsis myagroides</i>                   | 18.67 (0.65)                | 0.94           | 0.94                | 836.23   | 11.23 (0.04)                             | 1.12 (1.16) | 0.95           | 0.95                | 1000.24 | 16.52 (7.31)  | 54 |
| <i>Symphyocladia latiuscula</i>                | 3.88 (0.12)                 | 0.95           | 0.95                | 997.07   | 3.93 (0.04)                              | 0.98 (0.18) | 0.94           | 0.93                | 715.26  | 3.99 (0.99)   | 52 |

Supplementary Table S1. Continued.

| Species                                        | Linear regression (FW = aC) |                |                     |         | Power regression (FW = aC <sup>b</sup> ) |             |                |                     |         | FW/Cov. ratio |    |
|------------------------------------------------|-----------------------------|----------------|---------------------|---------|------------------------------------------|-------------|----------------|---------------------|---------|---------------|----|
|                                                | a (SE)                      | R <sup>2</sup> | Adj. R <sup>2</sup> | F-value | a (SE)                                   | b (SE)      | R <sup>2</sup> | Adj. R <sup>2</sup> | F-value | Mean (SE)     | n  |
| <i>Jania nipponica</i>                         | 3.80 (0.12)                 | 0.95           | 0.95                | 957.03  | 3.12 (0.05)                              | 1.11 (0.17) | 0.92           | 0.92                | 530.17  | 3.50 (1.16)   | 49 |
| <i>Zonaria diesingiana</i>                     | 5.13 (0.17)                 | 0.95           | 0.95                | 874.67  | 4.67 (0.05)                              | 0.99 (0.37) | 0.89           | 0.89                | 373.24  | 4.88 (1.56)   | 47 |
| <i>Gymnogongrus flabelliformis</i>             | 2.32 (0.09)                 | 0.93           | 0.93                | 614.02  | 1.85 (0.04)                              | 1.10 (0.12) | 0.94           | 0.93                | 625.34  | 2.16 (0.65)   | 45 |
| <i>Desmarestia viridis</i>                     | 9.97 (0.34)                 | 0.95           | 0.95                | 860.67  | 7.82 (0.05)                              | 1.04 (0.83) | 0.92           | 0.92                | 486.92  | 8.93 (3.04)   | 45 |
| <i>Amphiroa ephedraea</i>                      | 6.56 (0.17)                 | 0.97           | 0.97                | 1450.35 | 5.54 (0.04)                              | 1.05 (0.36) | 0.93           | 0.93                | 582.36  | 6.12 (1.86)   | 44 |
| <i>Binghamia californica</i>                   | 1.77 (0.09)                 | 0.90           | 0.90                | 387.55  | 1.29 (0.09)                              | 1.18 (0.13) | 0.80           | 0.79                | 163.17  | 1.61 (0.70)   | 43 |
| <i>Dictyopteris undulata</i>                   | 6.44 (0.23)                 | 0.95           | 0.95                | 793.79  | 3.86 (0.05)                              | 1.19 (0.32) | 0.95           | 0.94                | 691.82  | 5.36 (2.13)   | 42 |
| <i>Portieria japonica</i>                      | 2.86 (0.10)                 | 0.96           | 0.96                | 853.77  | 2.33 (0.06)                              | 1.14 (0.14) | 0.92           | 0.92                | 423.98  | 2.67 (0.82)   | 40 |
| <i>Dasyisiphonia japonica</i>                  | 8.60 (0.48)                 | 0.89           | 0.89                | 327.58  | 3.54 (0.07)                              | 1.43 (0.28) | 0.92           | 0.91                | 407.51  | 5.31 (2.57)   | 40 |
| <i>Distromium decumbens</i>                    | 2.53 (0.09)                 | 0.96           | 0.95                | 809.40  | 1.48 (0.04)                              | 1.19 (0.10) | 0.95           | 0.95                | 771.54  | 1.96 (0.70)   | 39 |
| <i>Laurencia obtusa</i>                        | 6.00 (0.26)                 | 0.94           | 0.93                | 550.04  | 3.81 (0.06)                              | 1.23 (0.27) | 0.93           | 0.93                | 496.66  | 4.88 (1.74)   | 39 |
| <i>Halopteris filicina</i>                     | 3.55 (0.11)                 | 0.97           | 0.96                | 1015.83 | 3.32 (0.04)                              | 0.98 (0.19) | 0.93           | 0.93                | 489.18  | 3.39 (0.87)   | 38 |
| <i>Jania arborescens</i>                       | 3.81 (0.16)                 | 0.94           | 0.94                | 561.54  | 2.22 (0.05)                              | 1.21 (0.18) | 0.94           | 0.94                | 569.89  | 3.03 (1.04)   | 37 |
| <i>Caulacanthus okamurae</i>                   | 2.19 (0.08)                 | 0.96           | 0.96                | 811.97  | 1.93 (0.05)                              | 1.04 (0.13) | 0.93           | 0.92                | 421.30  | 2.09 (0.62)   | 36 |
| <i>Halopeltis adnata</i>                       | 4.04 (0.18)                 | 0.93           | 0.93                | 485.74  | 1.86 (0.06)                              | 1.39 (0.14) | 0.93           | 0.93                | 479.31  | 2.63 (1.18)   | 36 |
| <i>Ecklonia cava</i> subsp. <i>stolonifera</i> | 27.31 (1.07)                | 0.95           | 0.95                | 656.15  | 11.71 (0.06)                             | 1.19 (2.20) | 0.93           | 0.93                | 450.25  | 23.29 (9.54)  | 35 |
| <i>Sargassum hemiphyllum</i>                   | 11.54 (0.29)                | 0.98           | 0.98                | 1631.55 | 5.56 (0.04)                              | 1.14 (0.43) | 0.96           | 0.95                | 692.72  | 6.91 (2.59)   | 35 |
| <i>Grateloupia crispata</i>                    | 5.16 (0.22)                 | 0.94           | 0.94                | 538.47  | 2.25 (0.07)                              | 1.51 (0.17) | 0.93           | 0.93                | 470.18  | 3.45 (1.82)   | 35 |
| <i>Lychaete sakaii</i>                         | 5.10 (0.12)                 | 0.98           | 0.98                | 1679.14 | 2.60 (0.04)                              | 1.18 (0.19) | 0.96           | 0.96                | 741.32  | 3.45 (1.19)   | 34 |

Supplementary Table S1. Continued.

| Species                                                | Linear regression (FW = aC) |                |                     |         | Power regression (FW = aC <sup>b</sup> ) |             |                |                     |         | FW/Cov. ratio |    |
|--------------------------------------------------------|-----------------------------|----------------|---------------------|---------|------------------------------------------|-------------|----------------|---------------------|---------|---------------|----|
|                                                        | a (SE)                      | R <sup>2</sup> | Adj. R <sup>2</sup> | F-value | a (SE)                                   | b (SE)      | R <sup>2</sup> | Adj. R <sup>2</sup> | F-value | Mean (SE)     | n  |
| <i>Dichotomaria apiculata</i>                          | 12.09 (0.26)                | 0.99           | 0.99                | 2213.35 | 7.23 (0.03)                              | 1.17 (0.45) | 0.98           | 0.98                | 1643.45 | 9.98 (3.02)   | 34 |
| <i>Laurencia pinnata</i>                               | 2.62 (0.12)                 | 0.93           | 0.93                | 460.30  | 2.16 (0.07)                              | 1.15 (0.14) | 0.89           | 0.89                | 263.87  | 2.37 (0.81)   | 34 |
| <i>Erythroglossum minimum</i>                          | 3.11 (0.11)                 | 0.96           | 0.96                | 738.98  | 2.27 (0.07)                              | 1.21 (0.15) | 0.91           | 0.91                | 334.57  | 2.63 (0.98)   | 34 |
| <i>Dictyopteris pacifica</i>                           | 6.20 (0.24)                 | 0.96           | 0.96                | 653.47  | 6.21 (0.05)                              | 0.95 (0.55) | 0.92           | 0.92                | 331.57  | 6.24 (1.91)   | 31 |
| <i>Codium fragile</i>                                  | 11.55 (0.27)                | 0.98           | 0.98                | 1799.34 | 9.39 (0.04)                              | 1.05 (0.60) | 0.96           | 0.96                | 778.54  | 10.27 (2.66)  | 31 |
| <i>Callophyllis adnata</i>                             | 3.68 (0.13)                 | 0.97           | 0.97                | 852.76  | 2.62 (0.05)                              | 1.19 (0.22) | 0.95           | 0.95                | 493.13  | 3.35 (1.20)   | 29 |
| <i>Herpochondria elegans</i>                           | 3.27 (0.24)                 | 0.87           | 0.87                | 185.05  | 3.38 (0.09)                              | 1.00 (0.27) | 0.82           | 0.81                | 119.42  | 3.65 (1.37)   | 28 |
| <i>Amphiroa echigoensis</i>                            | 7.58 (0.44)                 | 0.92           | 0.92                | 301.27  | 7.39 (0.04)                              | 1.06 (0.48) | 0.97           | 0.97                | 816.37  | 8.10 (2.44)   | 28 |
| <i>Dictyota dichotoma</i>                              | 6.28 (0.18)                 | 0.98           | 0.98                | 1272.52 | 4.27 (0.06)                              | 1.15 (0.38) | 0.94           | 0.94                | 418.51  | 5.32 (1.88)   | 28 |
| <i>Desmarestia dudresnayi</i> subsp. <i>tabacoides</i> | 7.89 (0.33)                 | 0.96           | 0.95                | 569.97  | 6.95 (0.05)                              | 1.00 (0.92) | 0.94           | 0.93                | 373.44  | 7.17 (1.62)   | 28 |
| <i>Sphacelaria californica</i>                         | 3.78 (0.11)                 | 0.98           | 0.98                | 1172.52 | 3.63 (0.06)                              | 1.03 (0.25) | 0.93           | 0.92                | 308.54  | 3.86 (1.28)   | 27 |
| <i>Champia recta</i>                                   | 9.31 (0.23)                 | 0.99           | 0.99                | 1705.51 | 6.07 (0.05)                              | 1.18 (0.41) | 0.96           | 0.96                | 539.32  | 7.22 (2.33)   | 26 |
| <i>Sargassum yendoii</i>                               | 14.19 (0.41)                | 0.98           | 0.98                | 1214.60 | 8.56 (0.06)                              | 1.15 (1.48) | 0.94           | 0.93                | 336.45  | 13.20 (3.36)  | 25 |
| <i>Dictyopteris latiuscula</i>                         | 6.56 (0.35)                 | 0.94           | 0.94                | 343.82  | 4.31 (0.09)                              | 1.11 (0.52) | 0.88           | 0.87                | 154.12  | 5.22 (2.09)   | 24 |
| <i>Sargassum serratifolium</i>                         | 15.37 (0.76)                | 0.95           | 0.95                | 412.73  | 5.13 (0.08)                              | 1.26 (1.38) | 0.93           | 0.92                | 262.24  | 13.01 (3.61)  | 23 |
| <i>Caulerpa okamurai</i>                               | 12.30 (0.53)                | 0.96           | 0.96                | 538.11  | 11.33 (0.06)                             | 1.07 (0.80) | 0.94           | 0.94                | 317.82  | 12.24 (3.27)  | 22 |
| <i>Cryptopleura membranacea</i>                        | 4.26 (0.17)                 | 0.97           | 0.97                | 599.32  | 3.33 (0.06)                              | 1.08 (0.34) | 0.95           | 0.95                | 372.02  | 3.89 (1.09)   | 22 |
| <i>Padina gymnospora</i>                               | 6.67 (0.19)                 | 0.99           | 0.98                | 1282.74 | 5.08 (0.05)                              | 1.13 (0.33) | 0.97           | 0.97                | 613.71  | 5.93 (1.46)   | 21 |
| <i>Laurencia okamurai</i>                              | 11.16 (0.34)                | 0.98           | 0.98                | 1057.80 | 7.36 (0.05)                              | 1.27 (0.39) | 0.98           | 0.97                | 752.56  | 9.31 (2.47)   | 21 |

Supplementary Table S1. Continued.

| Species                        | Linear regression (FW = aC) |                |                     |          | Power regression (FW = aC <sup>b</sup> ) |             |                |                     |         | FW/Cov. ratio |    |
|--------------------------------|-----------------------------|----------------|---------------------|----------|------------------------------------------|-------------|----------------|---------------------|---------|---------------|----|
|                                | a (SE)                      | R <sup>2</sup> | Adj. R <sup>2</sup> | F-value  | a (SE)                                   | b (SE)      | R <sup>2</sup> | Adj. R <sup>2</sup> | F-value | Mean (SE)     | n  |
| <i>Heterosiphonia pulchra</i>  | 3.57 (0.07)                 | 0.99           | 0.99                | 2326.25  | 2.57 (0.06)                              | 1.21 (0.19) | 0.96           | 0.95                | 377.93  | 2.89 (0.97)   | 20 |
| <i>Botryocladia wrightii</i>   | 11.04 (0.35)                | 0.98           | 0.98                | 992.68   | 9.02 (0.03)                              | 1.08 (0.44) | 0.98           | 0.98                | 1111.87 | 9.96 (1.56)   | 20 |
| <i>Sargassum fulvellum</i>     | 10.61 (0.57)                | 0.95           | 0.95                | 351.47   | 4.60 (0.09)                              | 1.26 (0.98) | 0.93           | 0.92                | 221.16  | 8.99 (2.57)   | 20 |
| <i>Sargassum micracanthum</i>  | 12.99 (0.19)                | 1.00           | 1.00                | 4584.17  | 10.93 (0.03)                             | 1.05 (0.71) | 0.98           | 0.98                | 1078.83 | 11.98 (1.89)  | 19 |
| <i>Polycoelia harveyana</i>    | 3.15 (0.13)                 | 0.97           | 0.97                | 618.18   | 1.92 (0.09)                              | 1.42 (0.17) | 0.93           | 0.93                | 240.96  | 2.74 (0.84)   | 19 |
| <i>Laurencia intricata</i>     | 5.14 (0.20)                 | 0.97           | 0.97                | 640.07   | 3.27 (0.08)                              | 1.28 (0.25) | 0.94           | 0.94                | 256.98  | 3.60 (1.37)   | 18 |
| <i>Phacelocarpus japonicus</i> | 12.87 (0.63)                | 0.96           | 0.96                | 423.81   | 6.88 (0.07)                              | 1.31 (0.78) | 0.95           | 0.95                | 319.39  | 10.86 (3.82)  | 18 |
| <i>Lychaete herpestica</i>     | 5.96 (0.24)                 | 0.98           | 0.97                | 628.75   | 5.65 (0.06)                              | 0.99 (0.33) | 0.95           | 0.94                | 266.83  | 5.69 (0.99)   | 17 |
| <i>Gelidium longiramulosum</i> | 7.48 (0.12)                 | 1.00           | 1.00                | 3748.29  | 6.23 (0.04)                              | 1.11 (0.40) | 0.98           | 0.98                | 809.53  | 7.25 (1.23)   | 16 |
| <i>Undaria peterseniana</i>    | 13.83 (0.69)                | 0.96           | 0.96                | 405.75   | 4.80 (0.07)                              | 1.26 (1.21) | 0.96           | 0.96                | 318.13  | 12.23 (4.29)  | 16 |
| <i>Hypnea asiatica</i>         | 6.25 (0.11)                 | 1.00           | 1.00                | 3449.18  | 5.37 (0.04)                              | 1.05 (0.29) | 0.98           | 0.98                | 809.82  | 5.59 (1.00)   | 16 |
| <i>Codium coactum</i>          | 16.03 (0.59)                | 0.98           | 0.98                | 728.44   | 11.62 (0.07)                             | 1.12 (1.46) | 0.95           | 0.95                | 278.69  | 14.67 (3.58)  | 16 |
| <i>Codium minus</i>            | 20.58 (0.50)                | 0.99           | 0.99                | 1668.35  | 12.75 (0.03)                             | 1.20 (0.62) | 0.99           | 0.99                | 1439.62 | 16.38 (3.84)  | 16 |
| <i>Sargassum confusum</i>      | 12.94 (0.41)                | 0.99           | 0.99                | 1005.63  | 9.92 (0.05)                              | 1.10 (0.87) | 0.98           | 0.98                | 552.68  | 11.89 (2.01)  | 15 |
| <i>Kallymenia crassiuscula</i> | 4.04 (0.27)                 | 0.94           | 0.94                | 219.21   | 2.55 (0.07)                              | 1.18 (0.22) | 0.96           | 0.96                | 307.37  | 2.98 (1.18)   | 15 |
| <i>Derbesia marina</i>         | 3.74 (0.16)                 | 0.98           | 0.98                | 581.89   | 3.53 (0.09)                              | 1.08 (0.23) | 0.92           | 0.91                | 131.08  | 3.67 (0.85)   | 14 |
| <i>Pterothamnion yezoense</i>  | 1.36 (0.05)                 | 0.99           | 0.99                | 906.78   | 1.26 (0.05)                              | 1.01 (0.06) | 0.97           | 0.97                | 437.90  | 1.28 (0.19)   | 14 |
| <i>Palisada intermedia</i>     | 7.59 (0.06)                 | 1.00           | 1.00                | 16617.76 | 5.94 (0.03)                              | 1.09 (0.29) | 0.99           | 0.99                | 1508.77 | 6.58 (1.28)   | 13 |
| <i>Grateloupia turuturu</i>    | 14.71 (0.46)                | 0.99           | 0.99                | 1006.20  | 13.85 (0.05)                             | 0.99 (1.02) | 0.98           | 0.97                | 397.91  | 13.95 (2.43)  | 12 |

Supplementary Table S1. Continued.

| Species                        | Linear regression (FW = aC) |                |                     |         | Power regression (FW = aC <sup>b</sup> ) |             |                |                     |         | FW/Cov. ratio |    | n |
|--------------------------------|-----------------------------|----------------|---------------------|---------|------------------------------------------|-------------|----------------|---------------------|---------|---------------|----|---|
|                                | a (SE)                      | R <sup>2</sup> | Adj. R <sup>2</sup> | F-value | a (SE)                                   | b (SE)      | R <sup>2</sup> | Adj. R <sup>2</sup> | F-value | Mean (SE)     |    |   |
| <i>Sonderophycus capensis</i>  | 4.80 (0.25)                 | 0.97           | 0.97                | 368.27  | 4.43 (0.12)                              | 1.04 (0.97) | 0.89           | 0.88                | 72.471  | 4.89 (1.41)   | 11 |   |
| <i>Schizymenia dubyi</i>       | 6.51 (0.17)                 | 0.99           | 0.99                | 1420.18 | 5.66 (0.08)                              | 1.08 (0.58) | 0.96           | 0.95                | 204.91  | 6.32 (0.96)   | 11 |   |
| <i>Ardissonula regularis</i>   | 8.09 (0.27)                 | 0.99           | 0.99                | 875.42  | 5.42 (0.07)                              | 1.21 (0.52) | 0.97           | 0.97                | 341.38  | 7.30 (1.13)   | 11 |   |
| <i>Dictyota implexa</i>        | 2.81 (0.15)                 | 0.97           | 0.97                | 338.03  | 3.23 (0.05)                              | 0.92 (0.20) | 0.98           | 0.97                | 316.69  | 3.06 (0.43)   | 10 |   |
| <i>Amphiroa galapagensis</i>   | 6.77 (0.15)                 | 1.00           | 1.00                | 1972.18 | 4.67 (0.16)                              | 1.33 (0.86) | 0.90           | 0.88                | 68.87   | 6.53 (1.89)   | 10 |   |
| <i>Grateloupia elata</i>       | 10.63 (0.29)                | 0.99           | 0.99                | 1368.81 | 6.66 (0.08)                              | 1.20 (1.14) | 0.97           | 0.96                | 237.39  | 10.30 (2.18)  | 10 |   |
| <i>Sargassum piluliferum</i>   | 12.34 (0.52)                | 0.98           | 0.98                | 564.89  | 12.98 (0.05)                             | 1.01 (1.76) | 0.98           | 0.98                | 462.22  | 13.39 (2.60)  | 10 |   |
| <i>Chaetomorpha moniligera</i> | 9.11 (0.44)                 | 0.98           | 0.98                | 433.18  | 4.85 (0.07)                              | 1.18 (0.62) | 0.98           | 0.97                | 316.96  | 6.48 (2.79)   | 10 |   |
| <i>Sporochnus radiciformis</i> | 5.89 (0.12)                 | 1.00           | 1.00                | 2289.63 | 4.74 (0.02)                              | 1.08 (0.19) | 1.00           | 1.00                | 2439.98 | 5.25 (0.83)   | 10 |   |
| <i>Polysiphonia morrowii</i>   | 6.67 (0.20)                 | 0.99           | 0.99                | 1073.77 | 3.74 (0.04)                              | 1.23 (0.26) | 0.99           | 0.99                | 840.98  | 5.20 (1.31)   | 10 |   |
| <i>Sargassum pinnatifidum</i>  | 16.33 (0.44)                | 0.99           | 0.99                | 1371.88 | 14.81 (0.05)                             | 1.04 (1.31) | 0.98           | 0.98                | 385.48  | 15.71 (2.73)  | 10 |   |
| <i>Jania rubens</i>            | 6.68 (0.21)                 | 0.99           | 0.99                | 1037.38 | 6.06 (0.12)                              | 1.03 (0.86) | 0.90           | 0.89                | 74.07   | 6.50 (1.84)   | 10 |   |
| <i>Dictyopteris divaricata</i> | 15.65 (0.86)                | 0.97           | 0.97                | 328.33  | 8.60 (0.05)                              | 1.20 (0.99) | 0.99           | 0.98                | 566.08  | 13.27 (3.43)  | 10 |   |
| <i>Scinaia japonica</i>        | 12.00 (1.05)                | 0.94           | 0.93                | 129.48  | 6.60 (0.10)                              | 1.30 (0.94) | 0.95           | 0.95                | 162.86  | 9.80 (3.09)   | 10 |   |
| <i>Scinaia okamurae</i>        | 15.97 (0.77)                | 0.98           | 0.98                | 430.11  | 8.82 (0.06)                              | 1.25 (0.71) | 0.98           | 0.98                | 415.03  | 11.06 (3.70)  | 10 |   |
| <i>Portieria hornemannii</i>   | 6.96 (0.43)                 | 0.97           | 0.96                | 262.75  | 4.77 (0.17)                              | 1.40 (0.59) | 0.89           | 0.88                | 64.27   | 5.54 (2.02)   | 10 |   |
| <i>Lomentaria lubrica</i>      | 3.27 (0.08)                 | 1.00           | 1.00                | 1693.59 | 2.95 (0.08)                              | 1.13 (0.26) | 0.97           | 0.97                | 179.22  | 3.14 (0.70)   | 7  |   |
| <i>Chondracanthus teedei</i>   | 3.96 (0.15)                 | 0.99           | 0.99                | 682.93  | 5.17 (0.09)                              | 0.82 (0.58) | 0.95           | 0.93                | 85.47   | 4.33 (0.90)   | 7  |   |
| <i>Peyssonnelia orientalis</i> | 3.61 (0.09)                 | 1.00           | 1.00                | 1583.80 | 3.12 (0.07)                              | 1.07 (0.30) | 0.98           | 0.97                | 220.27  | 3.39 (0.44)   | 7  |   |

Supplementary Table S1. Continued.

| Species                          | Linear regression (FW = aC) |                |                     |          | Power regression (FW = aC <sup>b</sup> ) |             |                |                     |          | FW/Cov. ratio |       |
|----------------------------------|-----------------------------|----------------|---------------------|----------|------------------------------------------|-------------|----------------|---------------------|----------|---------------|-------|
|                                  | a (SE)                      | R <sup>2</sup> | Adj. R <sup>2</sup> | F-value  | a (SE)                                   | b (SE)      | R <sup>2</sup> | Adj. R <sup>2</sup> | F-value  | Mean (SE)     | n     |
| <i>Champia bifida</i>            | 6.90 (0.30)                 | 0.99           | 0.99                | 515.70   | 6.77 (0.05)                              | 0.98 (0.40) | 0.99           | 0.99                | 439.37   | 6.73 (0.90)   | 7     |
| <i>Gelidium pusillum</i>         | 5.15 (0.47)                 | 0.95           | 0.94                | 118.49   | 4.94 (0.18)                              | 0.98 (0.68) | 0.86           | 0.83                | 30.42    | 5.07 (1.32)   | 7     |
| <i>Ecklonia</i> complex          | 27.36 (0.37)                | 0.89           | 0.89                | 5456.01  | 9.63 (0.45)                              | 1.22 (0.02) | 0.91           | 0.91                | 7009.33  | 21.53 (0.41)  | 702   |
| <i>Sargassum/Undaria</i> complex | 18.39 (0.17)                | 0.92           | 0.92                | 11574.70 | 6.57 (0.16)                              | 1.26 (0.01) | 0.94           | 0.94                | 17228.44 | 13.13 (0.22)  | 1056  |
| Understory complex               | 10.42 (0.06)                | 0.74           | 0.74                | 27684.20 | 4.38 (0.03)                              | 1.18 (0.01) | 0.87           | 0.87                | 66536.92 | 6.55 (0.05)   | 9866  |
| Total                            | 17.72 (0.10)                | 0.75           | 0.75                | 33994.82 | 4.48 (0.01)                              | 1.25 (0.04) | 0.89           | 0.89                | 94651.36 | 8.05 (0.06)   | 11624 |

All regression analysis results were significant (p<0.001).

n, number of samples; R<sup>2</sup>, coefficient of determination; Adj., adjusted; FW, fresh weight; Cov., coverage
